# Supplementary material for: Mg(OH)2 Films Prepared by Ink-Jet Printing and Their Photocatalytic Activity in CO2 Reduction and H2O Conversion
Source: Springer Nature journal article supplement (doi:10.1007/s11244-018-0966-6), 2018-04-20
Supplement: MOESM2 [file 15711318]

**Mg(OH)2 films prepared by ink-jet printing and their photocatalytic activity in CO2 reduction and H2O conversion**

E. Luévano-Hipólito1, Leticia M. Torres Martínez2,*

1 CONACYT - Universidad Autónoma de Nuevo León, Facultad de Ingeniería Civil-Departamento de Ecomateriales y Energía, Cd. Universitaria, C.P. 66455 San Nicolás de los Garza, NL, México.

2 Universidad Autónoma de Nuevo León, Facultad de Ingeniería Civil-Departamento de Ecomateriales y Energía, Cd. Universitaria, C.P. 66455 San Nicolás de los Garza, NL, México.

S
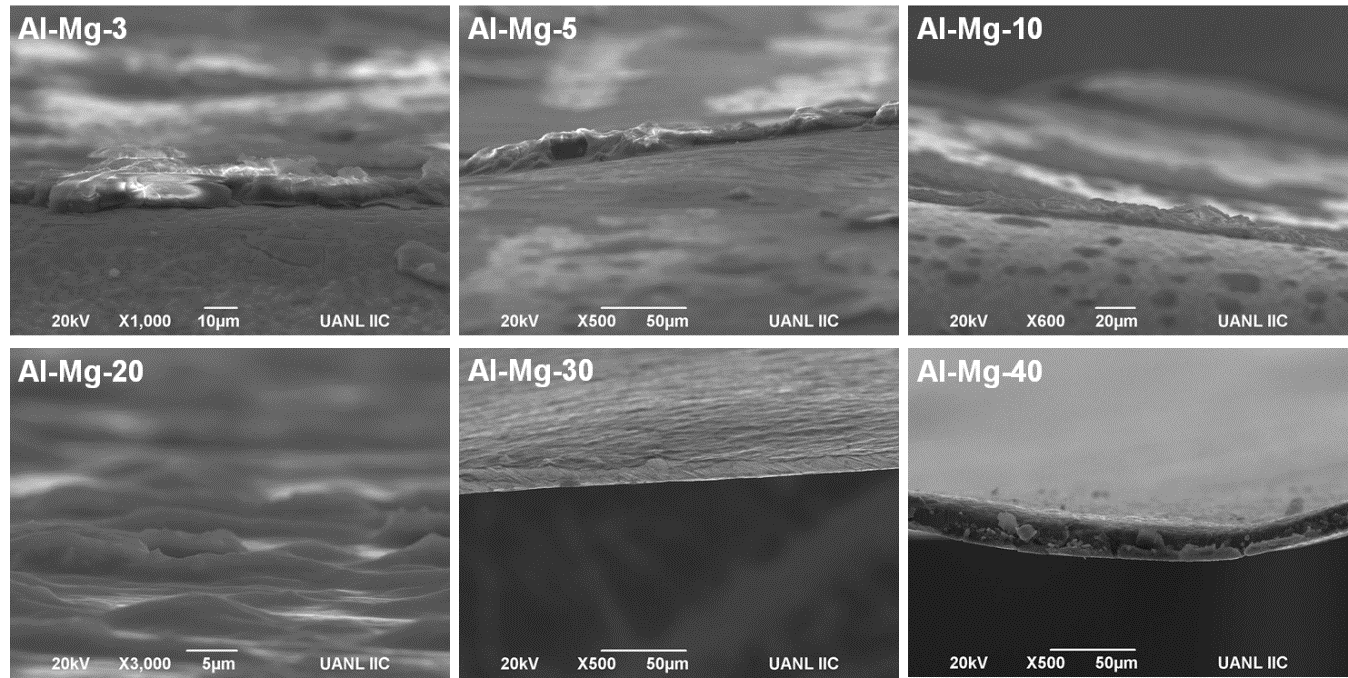


**Supplementary Figure S2**. Transversal analysis by Scanning Electron Microscopy of AlMgx samples.
